# Supplementary material
Source: MDPI journal article supplement (https://www.mdpi.com/2218-0532/87/4/28)
Supplement: s1 [file s1]

# Supplementary File 1 for:

## Design, synthesis and docking study of acyl thiourea derivatives as possible histone deacetylase inhibitors with a novel zinc binding group

### List of Spectra

|                                                                                                                     |   |
|---------------------------------------------------------------------------------------------------------------------|---|
| <b>Figure S1:</b> FT-IR spectrum of monosodium adipic monoanilide, <b>4d</b> .....                                  | 2 |
| <b>Figure S2:</b> FT-IR spectrum of monosodium pimelic monoanilide, <b>5d</b> .....                                 | 2 |
| <b>Figure S3:</b> FT-IR spectrum of <i>N</i> -adipoyl monoanilide thiourea, <b>4</b> .....                          | 2 |
| <b>Figure S4:</b> FT-IR spectrum of <i>N</i> -pimeloyl monoanilide thiourea, <b>5</b> .....                         | 2 |
| <b>Figure S5:</b> <sup>1</sup> H-NMR spectrum of <i>N</i> -adipoyl monoanilide thiourea, <b>4</b> .....             | 2 |
| <b>Figure S6:</b> <sup>13</sup> C-NMR of <i>N</i> -adipoyl monoanilide thiourea, <b>4</b> .....                     | 2 |
| <b>Figure S7:</b> A magnified <sup>13</sup> C-NMR spectrum of <i>N</i> -adipoyl monoanilide thiourea, <b>4</b> .... | 2 |
| <b>Figure S8:</b> <sup>1</sup> H-NMR spectrum of <i>N</i> -pimeloyl monoanilide thiourea, <b>5</b> .....            | 2 |
| <b>Figure S9:</b> <sup>13</sup> C-NMR spectrum of <i>N</i> -pimeloyl monoanilide thiourea, <b>5</b> .....           | 2 |
| <b>Figure S10:</b> A magnified <sup>13</sup> C-NMR spectrum of <i>N</i> -pimeloyl monoanilide thiourea, <b>5</b>    | 2 |

## FT-IR Spectra

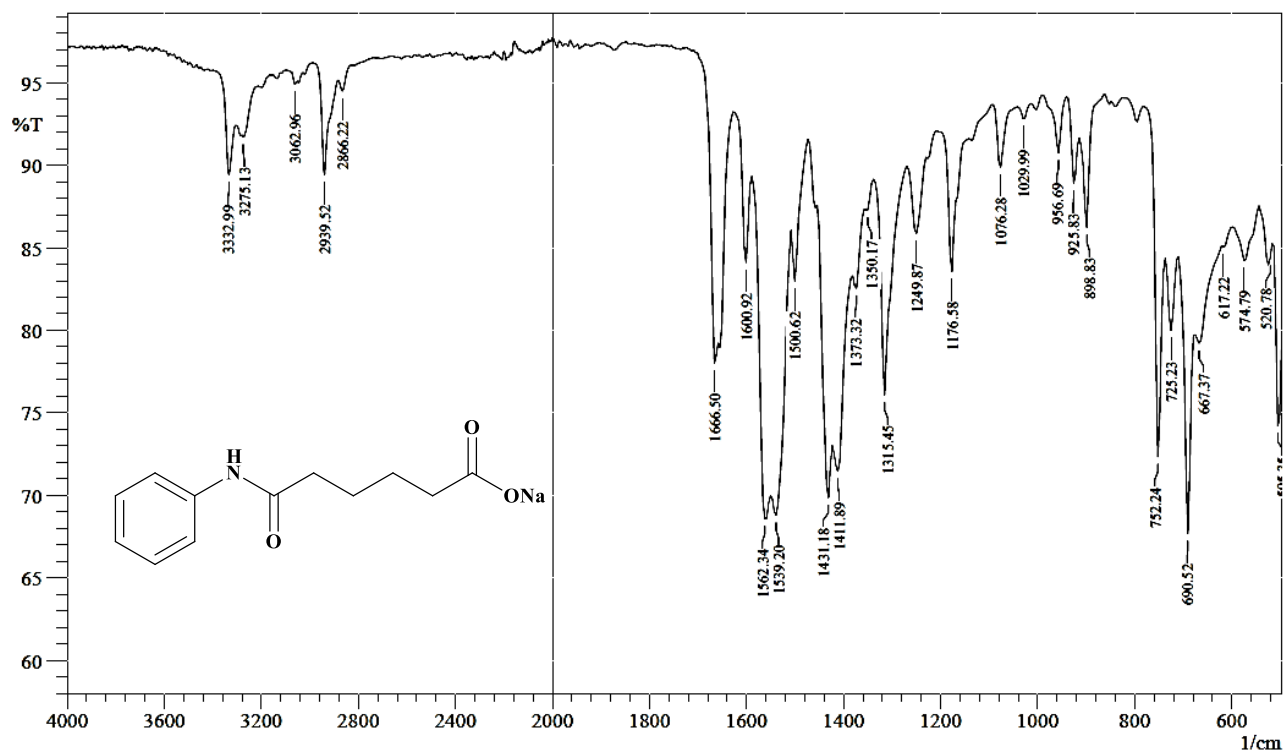

**Figure S1:** FT-IR spectrum of monosodium adipic monoanilide, **4d**

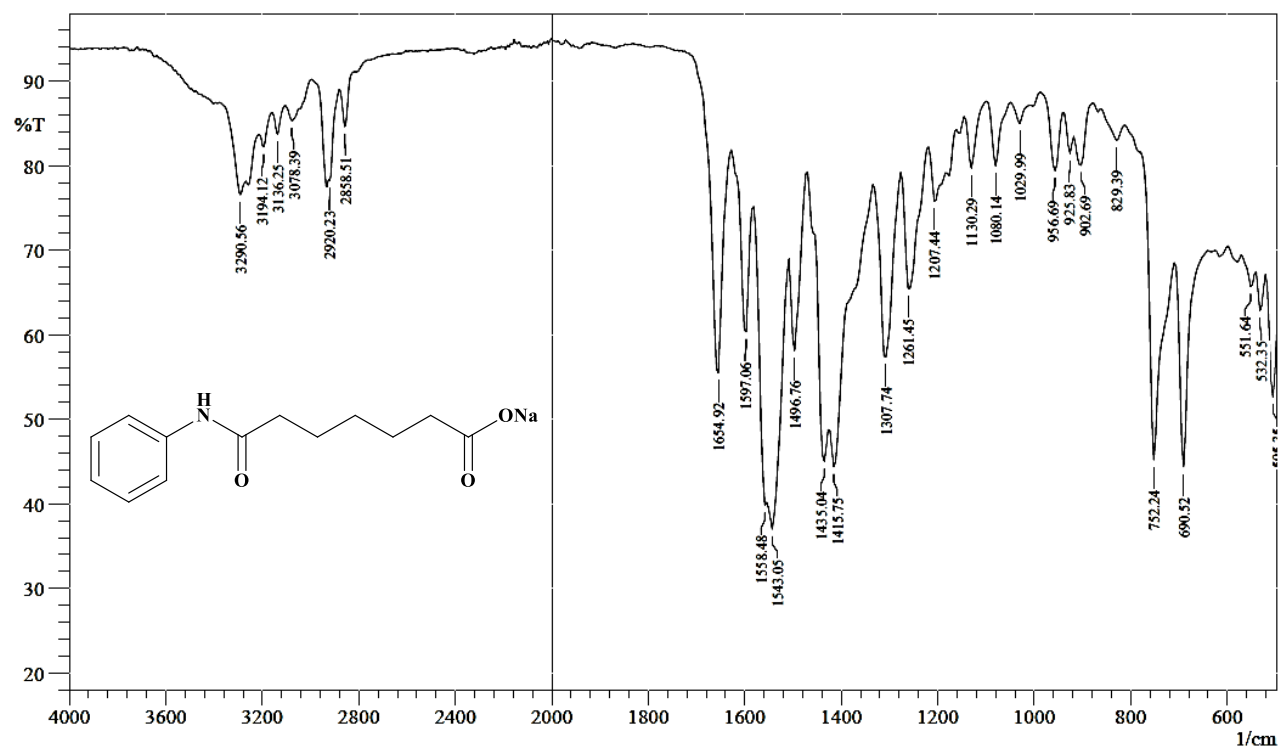

**Figure S2:** FT-IR spectrum of monosodium pimelic monoanilide, **5d**

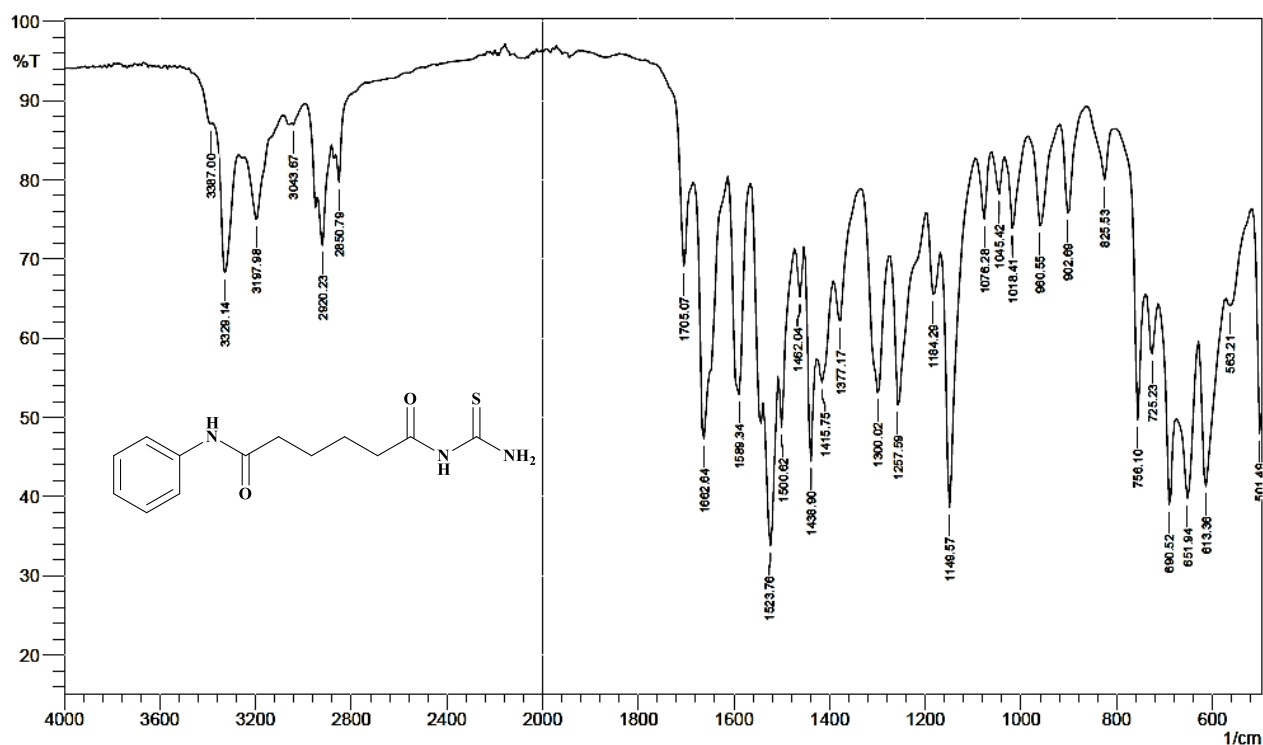

**Figure S3:** FT-IR spectrum of *N*-adipoyl monoanilide thiourea, **4**

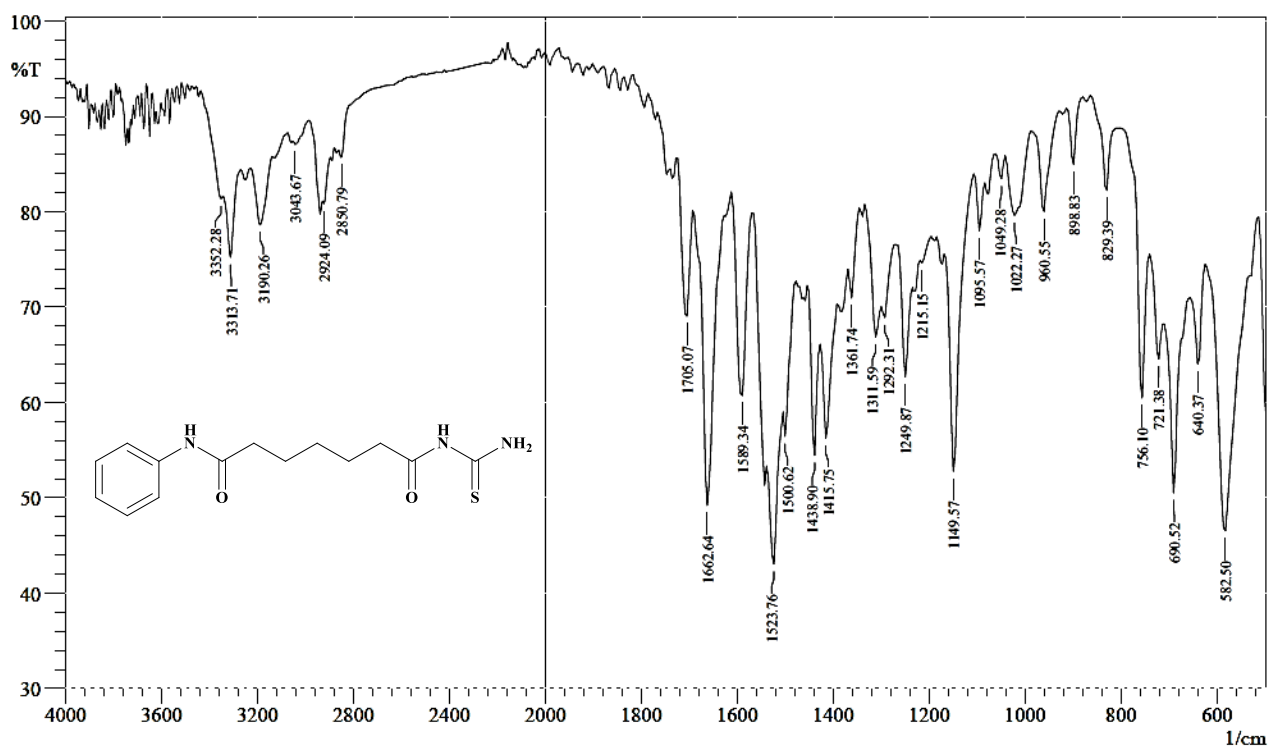

**Figure S4:** FT-IR spectrum of *N*-pimeloyl monoanilide thiourea, **5**

# NMR spectra

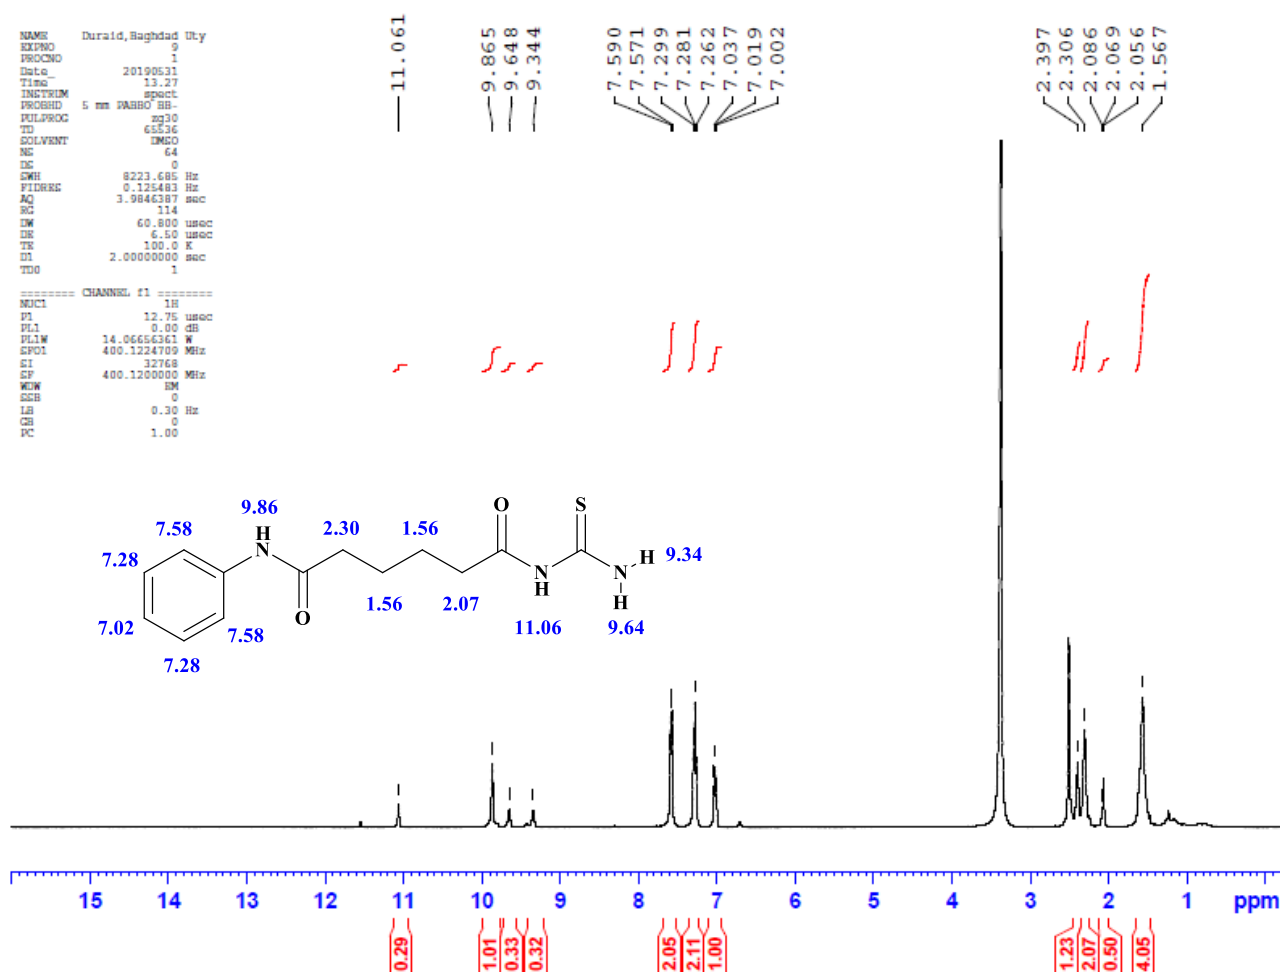

**Figure S5:** <sup>1</sup>H-NMR spectrum of *N*-adipoyl monoanilide thiourea, **4**

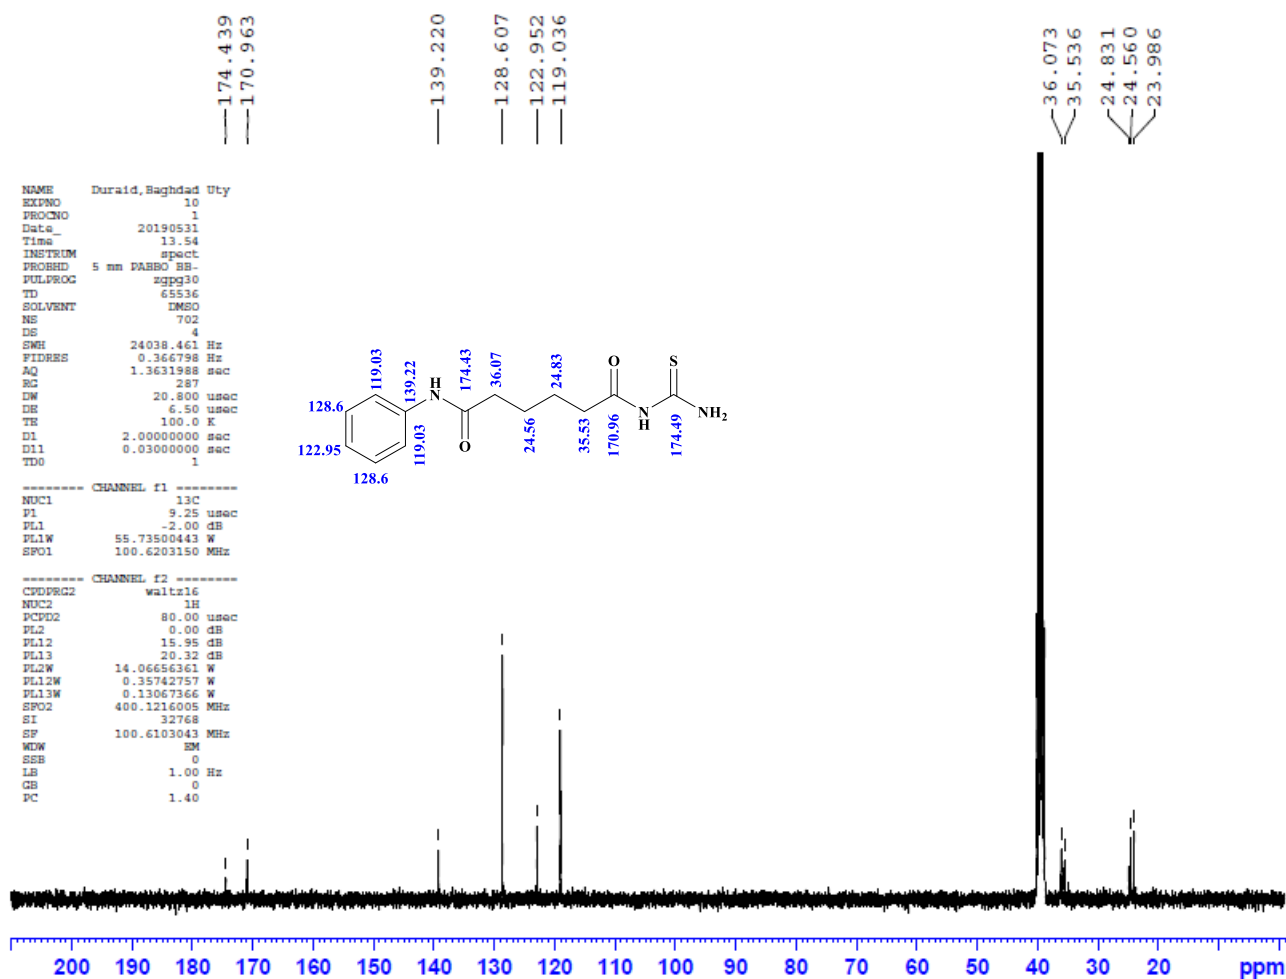

**Figure S6:** <sup>13</sup>C-NMR of *N*-adipoyl monoanilide thiourea, **4**

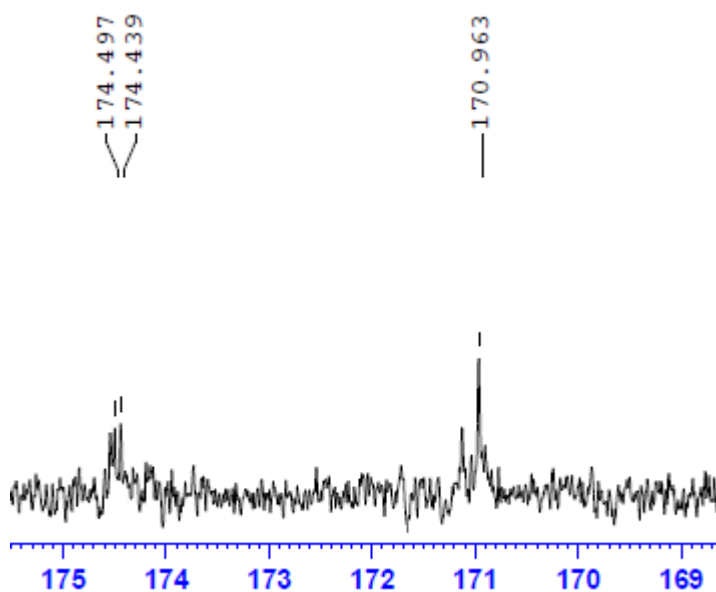

**Figure S7:** A magnified <sup>13</sup>C-NMR spectrum of *N*-adipoyl monoanilide thiourea, **4**

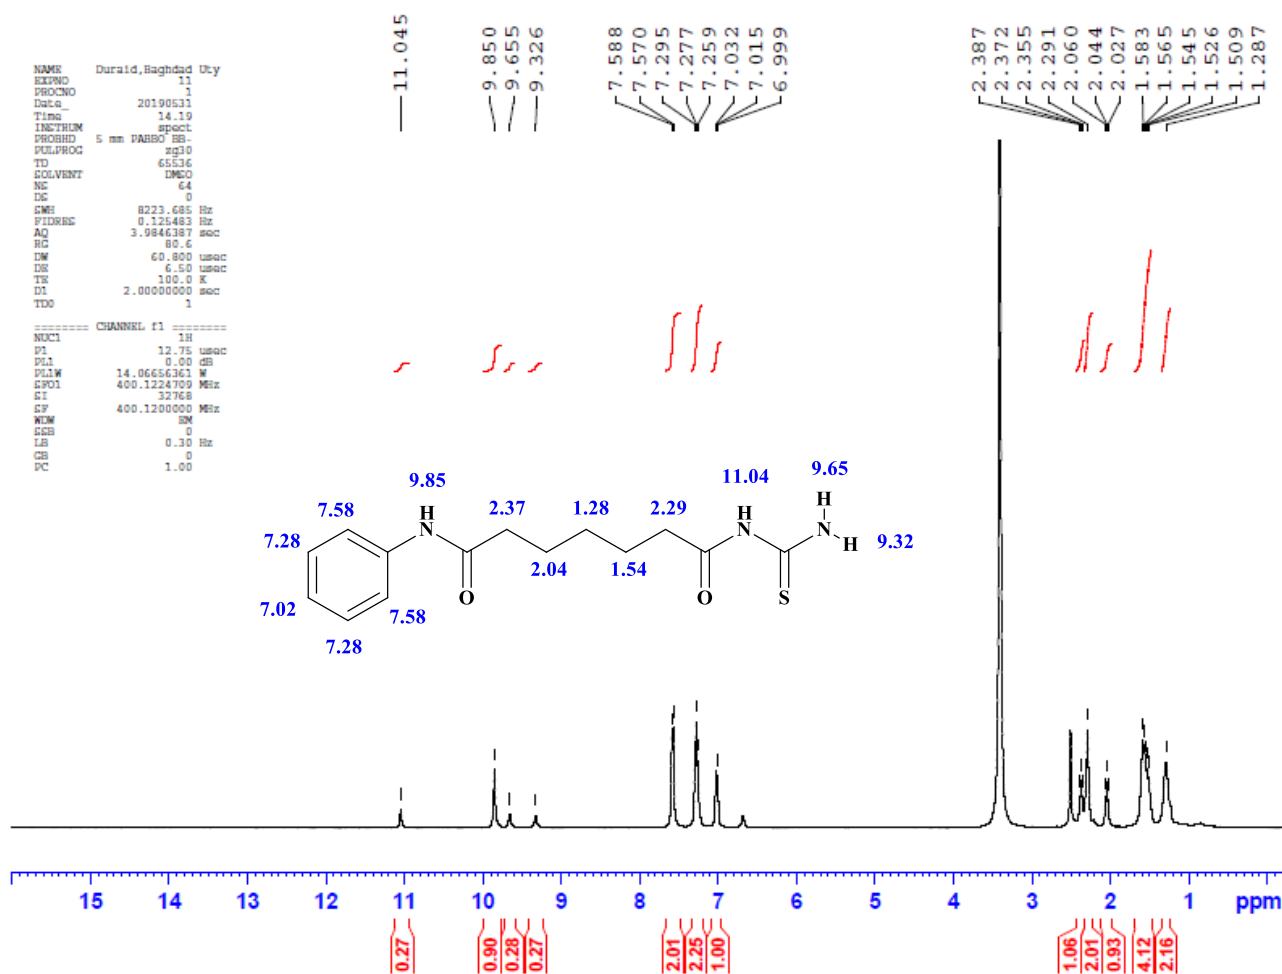

**Figure S8:**  $^1\text{H}$ -NMR spectrum of *N*-pimeloyl monoanilide thiourea, **5**

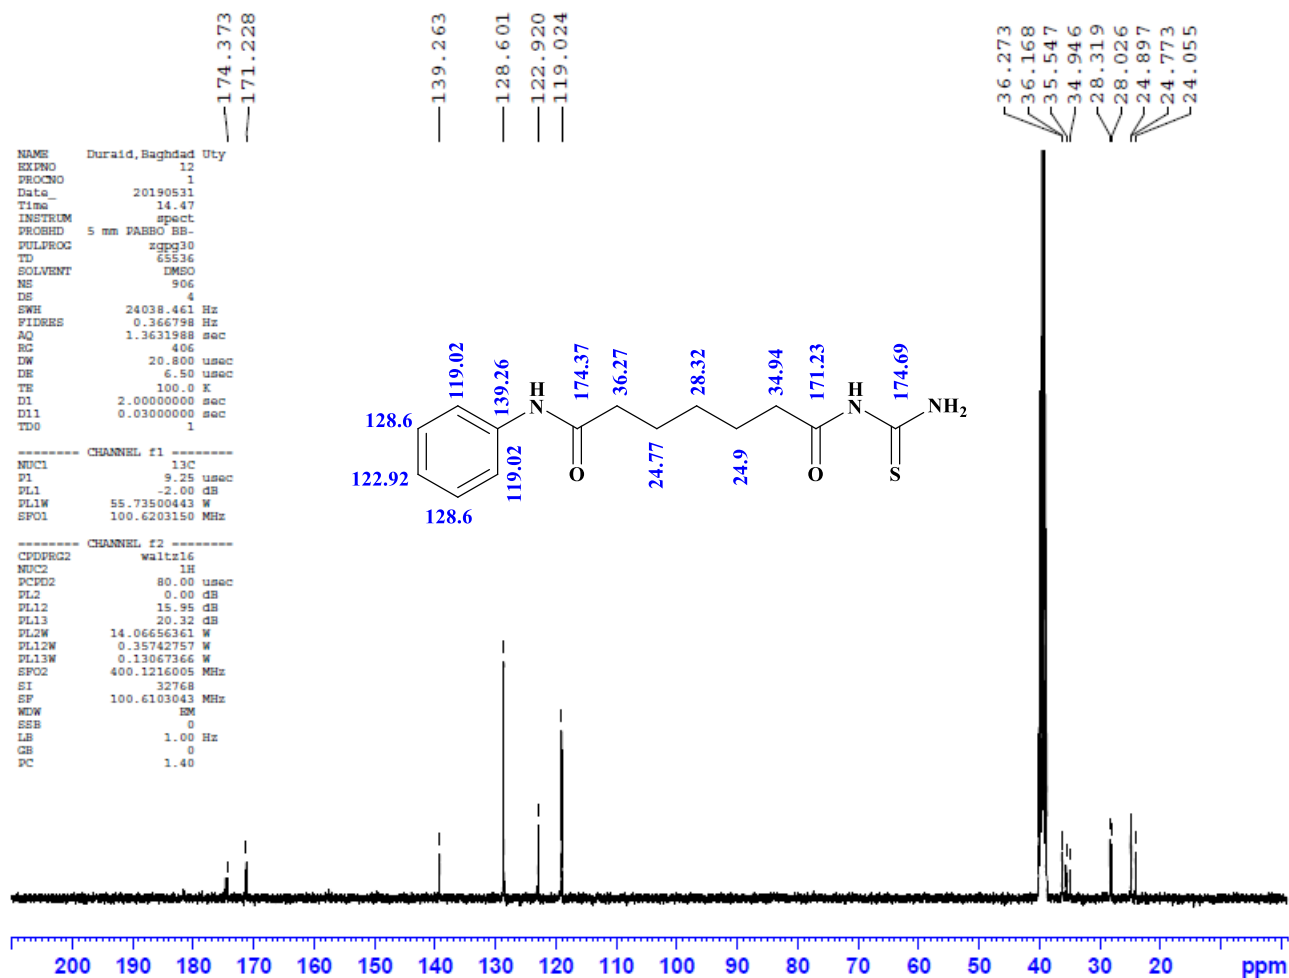

**Figure S9:** <sup>13</sup>C-NMR spectrum of *N*-pimeloyl monoanilide thiourea, **5**

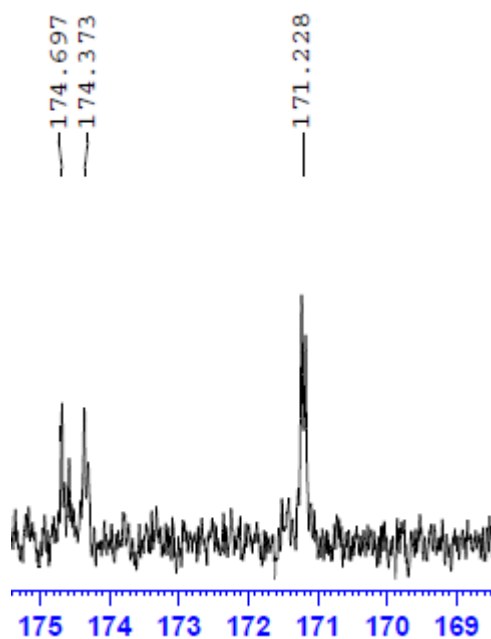

**Figure S10:** A magnified <sup>13</sup>C-NMR spectrum of *N*-pimeloyl monoanilide thiourea, **5**
