# Supplementary material
Source: MDPI journal article supplement (https://www.mdpi.com/2218-0532/87/4/28)
Supplement: s1 [file s1]

Archive with 2 entries (2 files):
- update - Supplementary File 1.pdf
- update - Supplementary File 2.pdf
